# Supplementary material
Source: Springer Nature journal article supplement (https://www.springermedizin.de/resource/supplementary/13054_2011_9612_MOESM1_ESM.pdf/9706580)

**(a)**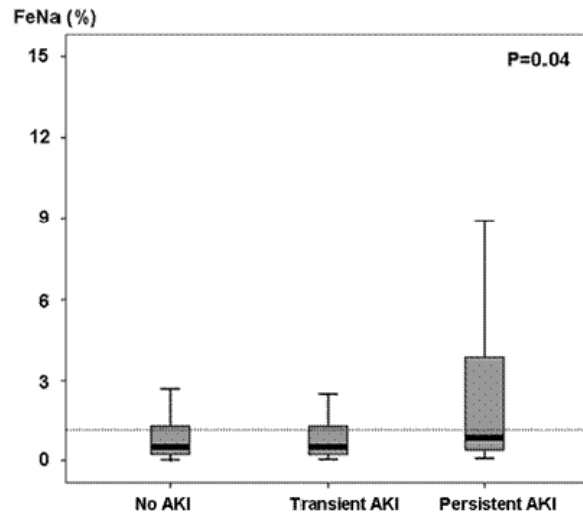**(b)**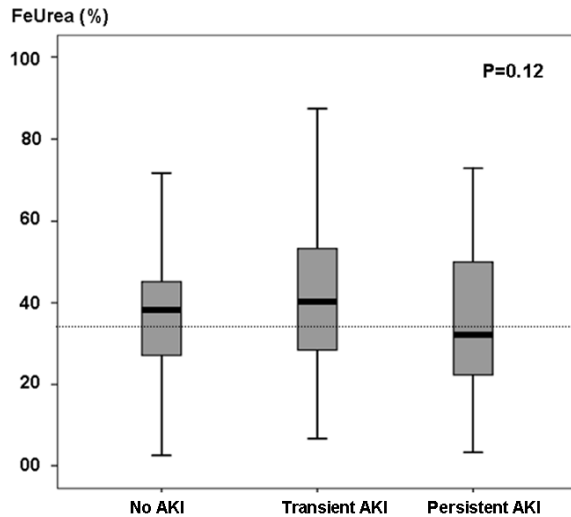**(c)**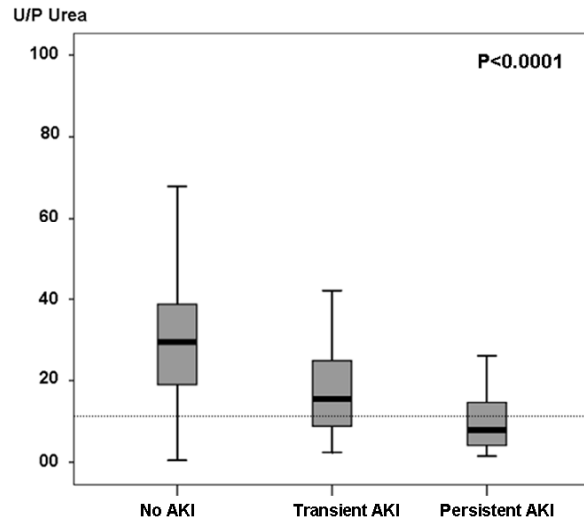

Supplement: MOESM1 [file 9706580]
